# Supplementary material for: Simple label-free fluorescence detection of apurinic/apyrimidinic endonuclease 1 activity and its inhibitor using the abasic site-binding fluorophore
Source: Royal Society of Chemistry journal article supplement (doi:10.1039/c8ay02633e), 2019-01-01
Supplement: c8ay02633e1.pdf [file c8ay02633e1.pdf]

## **Electronic Supplementary Information**

### **A Simple Label-Free Fluorescence Detection of Apurinic/Apyrimidinic Endonuclease 1 Activity and Its Inhibitor Using the Abasic Site-Binding Fluorophore**

Xuejun Li, Mei Xiong, Yufeng Huang, Liangliang Zhang\* and Shulin Zhao

State Key Laboratory for the Chemistry and Molecular Engineering of Medicinal  
Resources, School of Chemistry and Pharmaceutical Sciences, Guangxi Normal  
University, Guilin 541004, PR China

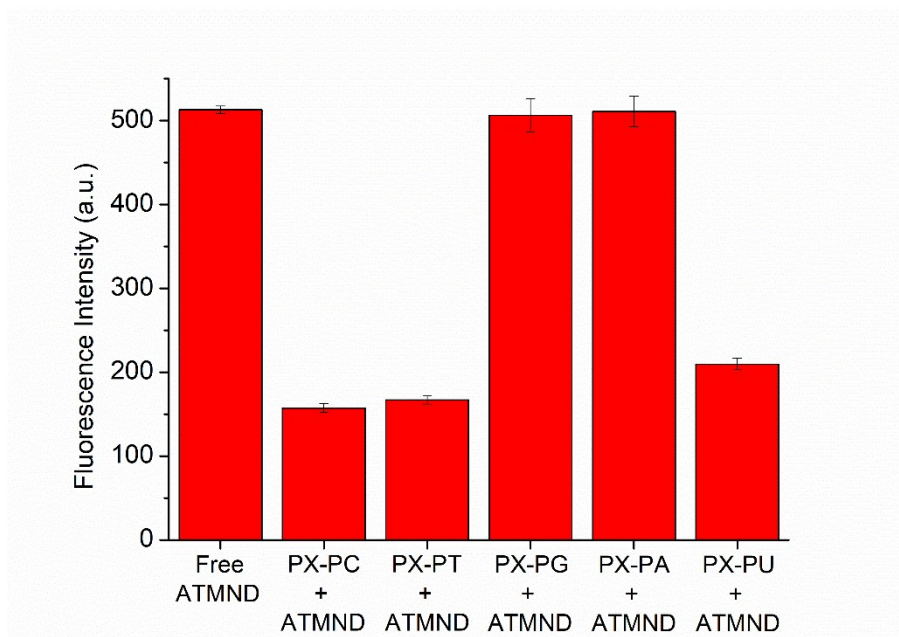

**Fig. S1** The fluorescence intensity of ATMND after adding into PX-PC/PT/PG/PA/PU dsDNA solutions. The concentration of dsDNA probe and ATMND are 200 nM and 150 nM, respectively.

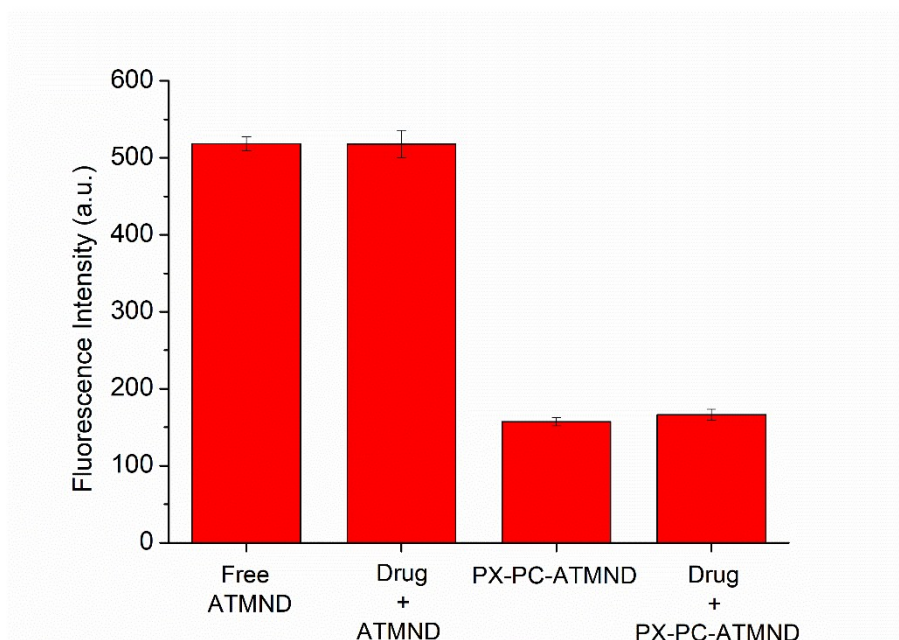

**Fig. S2** The effect of aurintricarboxylic acid (100 nM) on the fluorescence of free ATMND and PX-PC-ATMND system.
